# Supplementary material for: Photoelectrode Characteristics of Partially Hydrolyzed Aluminum Phthalocyanine Chloride/Fullerene C60 Composite Nanoparticles Working in a Water Phase
Source: Molecules. 2012 Sep 10;17(9):10801–15. doi: 10.3390/molecules170910801 (PMC6268333; doi:10.3390/molecules170910801)

## Supporting Information

**Figure S1.** Cyclic voltammograms of vapor deposited films on ITO. The electrolyte contained 0.1 M  $\text{KNO}_3$  in an air atmosphere; light intensity =  $100 \text{ mW/cm}^2$ ; scan rate is  $20 \text{ mV/s}$ .

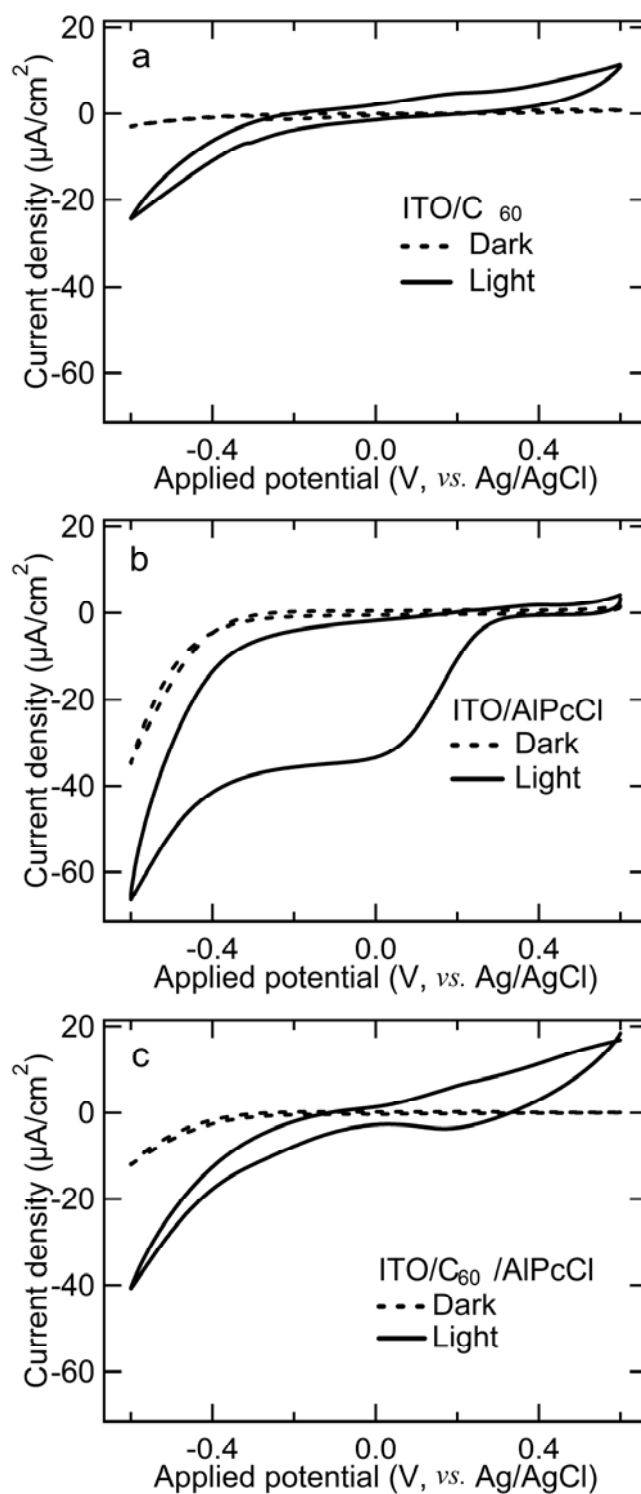

Figure S1. Cont.

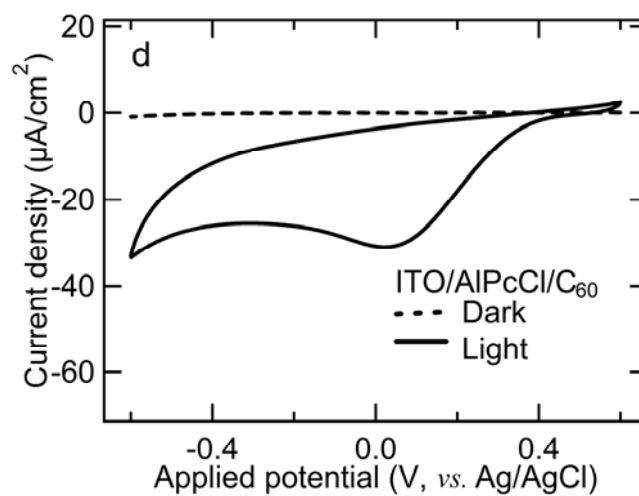

**Figure S2.** Schematic diagram of the photoelectrochemical processes for (a) an n-type monolayer; (b) a p-type monolayer; (c) an n/p bilayer; and (d) a p/n bilayer in the presence of an electron acceptor.

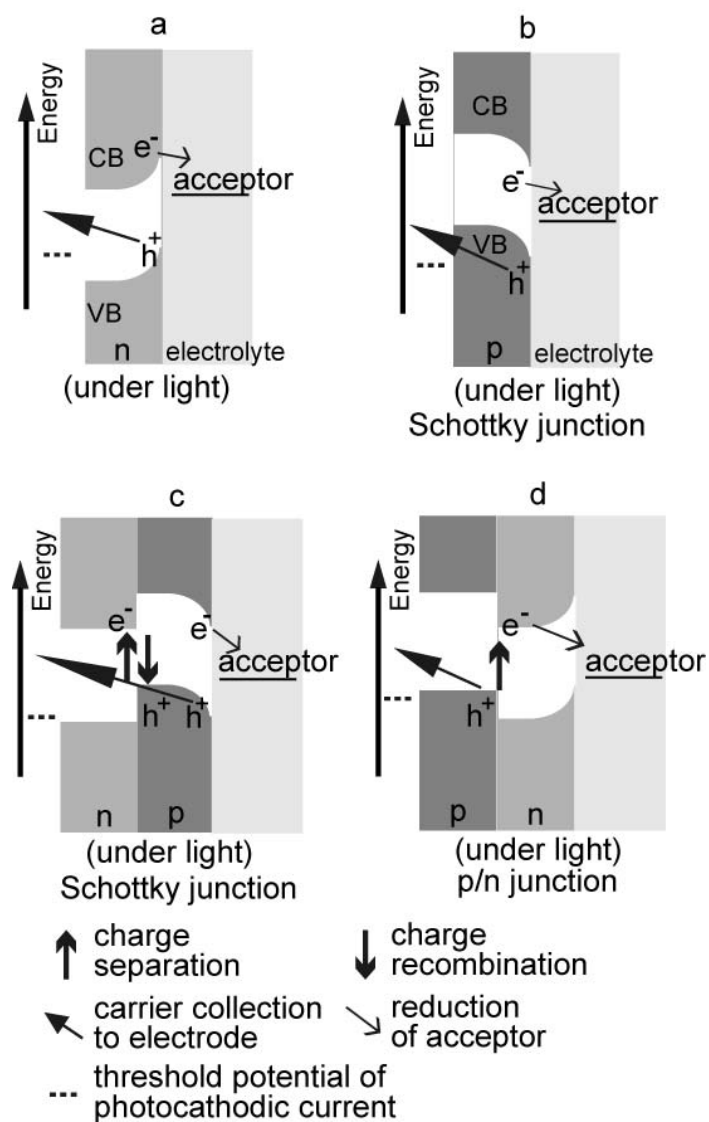

**Figure S3.** Cyclic voltammograms of nanoparticle films on ITO. The electrolyte contained 0.1 M KNO<sub>3</sub> in an Air (red lines) or Ar (dark lines) atmosphere; light intensity = 100 mW/cm<sup>2</sup>; scan rate is 20 mV/s.

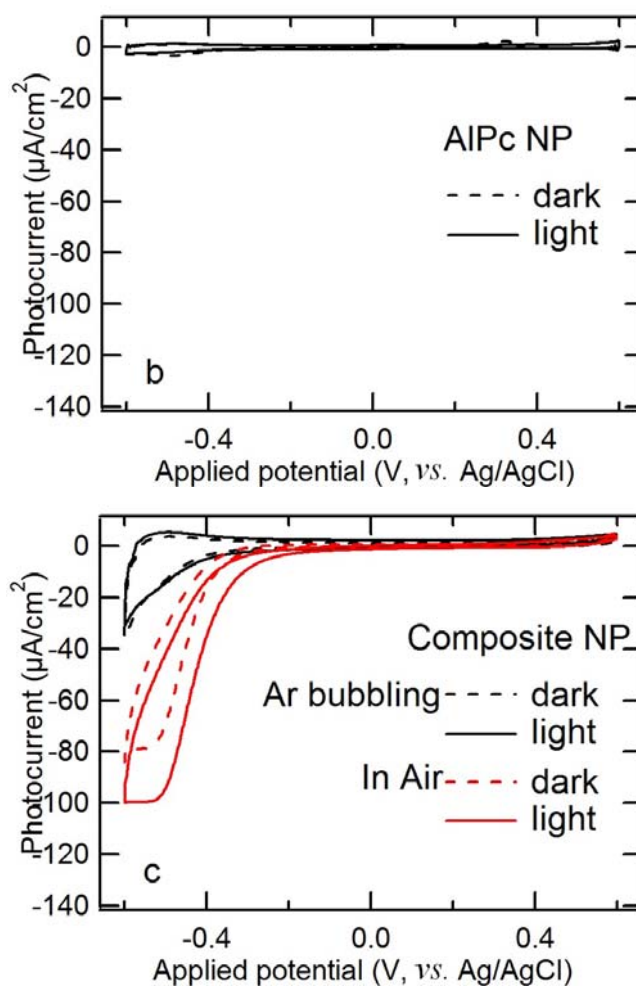

Supplement: Supplementary file 1 [file molecules-17-10801-s001.pdf]
